# Supplementary material for: Alcohol and older people: A systematic review of barriers, facilitators and context of drinking in older people and implications for intervention design
Source: PubMed Central journal article supplement (PMC5784942; doi:10.1371/journal.pone.0191189), 2018-01-25
Supplement: pone.0191189.s002.pdf [file pone.0191189.s002.pdf]

Supplement 2. Kelly et al, Alcohol and older people: a systematic review of barriers, facilitators and context of drinking in older people and implications for intervention design.

### Excluded studies and reason for exclusion

Only excluded studies relevant to alcohol reported below: searches included a range of health behaviours.

| Study                                                                                                                                                                                       | Reason excluded                                                                                                                                                                                                                                    |
|---------------------------------------------------------------------------------------------------------------------------------------------------------------------------------------------|----------------------------------------------------------------------------------------------------------------------------------------------------------------------------------------------------------------------------------------------------|
| Nicholson D, McCormack F, Seaman P, Bell K, Duffy T, Gilhooly M: Alcohol and healthy ageing: a challenge for alcohol policy. <i>Public Health</i> 2017, 148:13-18.                          | Meets inclusion criteria but published after search cut off dates. Has been discussed in the discussion section of the review                                                                                                                      |
| <b>Gavens L, Goyder E, Hock ES, Harris J, Meier PS. Alcohol consumption after health deterioration in older adults: a mixed-methods study. <i>Public Health</i> 2016; 139:79–87.</b>        | <b>Has a qualitative component of relevance to B/F but only recruited people with existing major health conditions (excluded from this review), who may have reduced drinking in response to illness</b>                                           |
| Pettigrew S, Pescud M: The salience of alcohol-related issues across the adult lifespan. <i>Health Education Journal</i> 2016, 75(1):117-128.                                               | Only included people aged 18-65, excluded people aged 65+. Sub group of older people comprised people aged 46 to 64 so results only relevant to 46 to 64 age group, mean age of that population lower than the cut-off age for inclusion (55+ yrs) |
| Immonen S, Valvanne J, Pitkala KH: Older adults' own reasoning for their alcohol consumption. <i>Int J Geriatr Psychiatry</i> 2011, 26(11):1169-1176.                                       | Not formally a qualitative study – uses pre-defined responses. Has a very small section asking why people made changes to their drinking but very limited data                                                                                     |
| Bakhshi S, While AE: Older people and alcohol use. <i>Gastrointestinal Nursing</i> 2015, 13(Sup10):S27-S32.                                                                                 | Review, not SR, not B/F                                                                                                                                                                                                                            |
| Bamberger PA: Winding Down and Boozing Up: The Complex Link Between Retirement and Alcohol Misuse. <i>Work Aging and Retirement</i> 2015, 1(1):92-111.                                      | Review, not SR, not focused on qualitative studies                                                                                                                                                                                                 |
| Barry KL, Blow FC: Drinking Over the Lifespan: Focus on Older Adults. <i>Alcohol Research: Current Reviews</i> 2016, 38(1):115-120.                                                         | Review, not SR, not B/F                                                                                                                                                                                                                            |
| Britton A, Bell S: Reasons why people change their alcohol consumption in later life: Findings from the Whitehall II Cohort Study. <i>PLoS ONE</i> 2015, 10 (3) (no pagination) (e0119421). | Not qualitative study                                                                                                                                                                                                                              |
| Collum SP: The effect of social support and quality of life on attitudes towards drinking in a population of older adults. US: ProQuest Information & Learning; 2015.                       | Not qualitative study                                                                                                                                                                                                                              |

Supplement 2. Kelly et al, Alcohol and older people: a systematic review of barriers, facilitators and context of drinking in older people and implications for intervention design.

|                                                                                                                                                                                                                                                                                                 |                                                                                                                                                 |
|-------------------------------------------------------------------------------------------------------------------------------------------------------------------------------------------------------------------------------------------------------------------------------------------------|-------------------------------------------------------------------------------------------------------------------------------------------------|
| Draper B: Barriers and facilitators to accessing specialist drug and alcohol services for older people with risky substance use. <i>International Psychogeriatrics</i> 2015, 27:S25-S26.                                                                                                        | Potentially relevant but abstract only. Checked for full paper but none found.                                                                  |
| Enggasser JL, Hermos JA, Rubin A, et al. Drinking goal choice and outcomes in a Web-based alcohol intervention: results from VetChange. <i>Addictive Behaviors</i> 2015; 42:63–8.                                                                                                               | Not older people - Mean age 31-33                                                                                                               |
| Fitzgerald N, Platt L, Heywood S, McCambridge J: Large-scale implementation of alcohol brief interventions in new settings in Scotland: a qualitative interview study of a national programme. <i>BMC Public Health</i> 2015, 15:289.                                                           | No data specific to older people                                                                                                                |
| Khan N, Wilkinson J, Keeling S: Reasons for changing alcohol use among older people in New Zealand. <i>Australasian Journal on Ageing</i> 2006, 25(2):97.                                                                                                                                       | Used a questionnaire to collect data with pre-defined questions which were checked against open-ended responses so not really qualitative data. |
| Dent OF, Grayson DA, Waite LM, Cullen JS, Creasey H, Broe GA: Alcohol consumption in a community sample of older people. <i>Australian and New Zealand journal of public health</i> 2000, 24(3):323-326.                                                                                        | Not qualitative study                                                                                                                           |
| Dias P, Oliveira A, Lopes C: Social and behavioural determinants of alcohol consumption. <i>Annals of Human Biology</i> 2011, 38(3):337-344.                                                                                                                                                    | Not qualitative study, not older people                                                                                                         |
| Hajat S, Haines A, Bulpitt C, Fletcher A: Patterns and determinants of alcohol consumption in people aged 75 years and older: Results from the MRC trial of assessment and management of older people in the community. <i>Age and Ageing</i> 2004, 33(2):170-177.                              | Not qualitative study                                                                                                                           |
| McDougall Jr GJ, Becker H, Delville CL, Vaughan PW, Acee TW: Alcohol use and older adults: A little goes a long way. <i>International Journal on Disability and Human Development</i> 2007, 6(4):431-440.                                                                                       | Not qualitative study                                                                                                                           |
| Molander RC, Yonker JA, Krahn DD: Age-related changes in drinking patterns from mid- to older age: results from the Wisconsin longitudinal study. <i>Alcoholism: Clinical &amp; Experimental Research</i> 2010, 34(7):1182-1192.                                                                | Not qualitative study                                                                                                                           |
| Nuevo R, Chatterji S, Verdes E, Naidoo N, Ayuso-Mateos JL, Miret M: Prevalence of alcohol consumption and pattern of use among the elderly in the WHO European region. <i>European Addiction Research</i> 2015, 21(2):88-96.                                                                    | Not qualitative study                                                                                                                           |
| Tredal I, Soares JF, Sundin Ö, Viitasara E, Melchiorre MG, Torres-Gonzales F, Stankunas M, Lindert J, Ioannidi-Kapolou E, Barros H: Alcohol use among abused and non-abused older persons aged 60–84 years: An European study. <i>Drugs: Education, Prevention &amp; Policy</i> 2013, 20(2):96. | Not qualitative study                                                                                                                           |
