# Supplementary material for: Alcohol and older people: A systematic review of barriers, facilitators and context of drinking in older people and implications for intervention design
Source: PubMed Central journal article supplement (PMC5784942; doi:10.1371/journal.pone.0191189), 2018-01-25
Supplement: pone.0191189.s003.pdf [file pone.0191189.s003.pdf]

Supplement 3. Kelly et al, Alcohol and older people: a systematic review of barriers, facilitators and context of drinking in older people and implications for intervention design.

### Further characteristics of included studies

| Study                      | Study design                                                      | Country   | Age (years)                        | Population and setting                                                                                                                                                                                                                                                                                                                                                                                                                                                       | Study objective                                                                                                 | Overall summary of study quality ± (for qualitative components) |
|----------------------------|-------------------------------------------------------------------|-----------|------------------------------------|------------------------------------------------------------------------------------------------------------------------------------------------------------------------------------------------------------------------------------------------------------------------------------------------------------------------------------------------------------------------------------------------------------------------------------------------------------------------------|-----------------------------------------------------------------------------------------------------------------|-----------------------------------------------------------------|
| <b>Qualitative studies</b> |                                                                   |           |                                    |                                                                                                                                                                                                                                                                                                                                                                                                                                                                              |                                                                                                                 |                                                                 |
| Burris 2015                | In-depth interviews (n=11)<br><br>(part of a mixed methods study) | US        | Mean: 81.5 (7.5);<br>Range 68-90   | N=11 older adults living independently in a congregate retirement community, who were regular drinkers. The setting included onsite pubs and retail shops offering alcohol<br><br>Gender: 45.5% male; 54.5% female<br>SES: Not reported<br>Ethnicity: 100% Caucasian<br>Alcohol consumption: Regular drinkers only included (drank on at least 6 of 8 days assessed).<br>Participants drank on 92% of days in the last 8 days; with mean of 1.88 drinks on days people drank | Understanding older adults attitudes and beliefs about drinking: perspectives of residents in congregate living | +                                                               |
| Dare 2014                  | Qualitative study (in-depth interviews)                           | Australia | 65-74<br><br>(Mean: 69.7 (SD 3.3)) | N=20 men and N=22 women who were living in either private residences or (secular, resident-funded) retirement villages<br><br>Gender: 47.6% male; 52.4% female<br><br>SES: Participants from areas classified as having higher levels of socioeconomic advantage and >50% had a post-school qualification.<br><br>Ethnicity: not reported                                                                                                                                    | To identify relationships between social engagement, setting and alcohol use                                    | ++                                                              |

Supplement 3. Kelly et al, Alcohol and older people: a systematic review of barriers, facilitators and context of drinking in older people and implications for intervention design.

| Study                                                                             | Study design                    | Country        | Age (years)  | Population and setting                                                                                                                                                                                                                                                                                                                                                                                                                                                                                                                                                                                                                                                             | Study objective                                                             | Overall summary of study quality ± (for qualitative components) |
|-----------------------------------------------------------------------------------|---------------------------------|----------------|--------------|------------------------------------------------------------------------------------------------------------------------------------------------------------------------------------------------------------------------------------------------------------------------------------------------------------------------------------------------------------------------------------------------------------------------------------------------------------------------------------------------------------------------------------------------------------------------------------------------------------------------------------------------------------------------------------|-----------------------------------------------------------------------------|-----------------------------------------------------------------|
|                                                                                   |                                 |                |              | <p>Alcohol consumption: Over 75% drinking alcohol more than 4 days/wk. Average daily consumption of alcohol based on quantity/frequency (standard drinks): Private home; men 1.89 (1.4); women 1.21 (0.8); Retirement village: men 3.13 (4.4); women 1.68 (1.1)</p> <p>The majority of men and women were drinking at low risk classification levels based on WHO at-risk drinking classification (based on 2000 criteria)</p>                                                                                                                                                                                                                                                     |                                                                             |                                                                 |
| <p>Haarni 2010<br/>(Too Much is Always Too Much – Alcohol and Ageing project)</p> | <p>Qualitative (interviews)</p> | <p>Finland</p> | <p>60-75</p> | <p>N=31 Urban older adults</p> <p>Gender: 48.4% male; 51.6% female</p> <p>SES: 14 had passed the matriculation examination, eight the middle school, and eight had at least the equivalent of elementary school studies. 28 were retired, 1 unemployed, 2 still working; ‘Prior to retirement...had worked in a variety of blue and white collar professions in occupations ranging from managing director to auxiliary nurse’</p> <p>Ethnicity: not reported</p> <p>Alcohol consumption: Current or ex-consumers of alcohol were included. People who had abstained from alcohol all their life were excluded. Reports ‘the study included many kinds of alcohol consumers’ –</p> | <p>Life experience and alcohol: 60-75 year olds relationship to alcohol</p> | <p>-</p>                                                        |

Supplement 3. Kelly et al, Alcohol and older people: a systematic review of barriers, facilitators and context of drinking in older people and implications for intervention design.

| Study                                         | Study design                                                   | Country                 | Age (years)                       | Population and setting                                                                                                                                                                                                                                                                                                                                                                                                                                                                                                                                                                                                               | Study objective                                                                                                              | Overall summary of study quality ± (for qualitative components) |
|-----------------------------------------------|----------------------------------------------------------------|-------------------------|-----------------------------------|--------------------------------------------------------------------------------------------------------------------------------------------------------------------------------------------------------------------------------------------------------------------------------------------------------------------------------------------------------------------------------------------------------------------------------------------------------------------------------------------------------------------------------------------------------------------------------------------------------------------------------------|------------------------------------------------------------------------------------------------------------------------------|-----------------------------------------------------------------|
|                                               |                                                                |                         |                                   | included range of drinkers, including large, average and small amounts and frequencies                                                                                                                                                                                                                                                                                                                                                                                                                                                                                                                                               |                                                                                                                              |                                                                 |
| Haighton 2016<br>(same sample as Wilson 2013) | Qualitative (Interviews (N=24) and focus groups (N=27 people)) | UK (North East England) | 50+<br>Range: 50-95               | N=24 (qualitative interviews) and N=27 (focus groups) older adults recruited through Age UK and regional services for alcohol problems who had experience of drinking alcohol at any level of consumption<br>Gender: 50% male; 50% female (interviews); 22.2% male; 77.8% female<br>SES: Not reported<br>Ethnicity: not reported<br>Alcohol consumption: Those recruited had a range of patterns of consumption including occasional minimal drinkers, moderate and heavy drinkers, previously dependent drinkers (including those now abstinent and those currently drinking at sensible levels) and 2 currently dependent drinkers | Experiences of and attitudes towards services providing support for alcohol related health issues in people aged 50 and over | ++                                                              |
| Johannessen 2015                              | Qualitative (interviews)                                       | Norway                  | 65+<br>(range 65 to 92; mean: 81) | N=16 older people that received in-home nursing service or home-help services (N=14 were widows or widowers)<br>Gender: 37.5% male; 62.5% female<br><br>SES: Not reported<br><br>Ethnicity: not reported<br><br>Alcohol consumption: 15 (of 16) had used alcohol.                                                                                                                                                                                                                                                                                                                                                                    | Older peoples' experience with and reflections on use and misuse of alcohol and psychotropic drugs                           | ++                                                              |

Supplement 3. Kelly et al, Alcohol and older people: a systematic review of barriers, facilitators and context of drinking in older people and implications for intervention design.

| Study        | Study design                                                                                    | Country | Age (years)                                        | Population and setting                                                                                                                                                                                                                                                                                                                                                                                | Study objective                                                                           | Overall summary of study quality ± (for qualitative components) |
|--------------|-------------------------------------------------------------------------------------------------|---------|----------------------------------------------------|-------------------------------------------------------------------------------------------------------------------------------------------------------------------------------------------------------------------------------------------------------------------------------------------------------------------------------------------------------------------------------------------------------|-------------------------------------------------------------------------------------------|-----------------------------------------------------------------|
| Joseph 2012  | Qualitative (in-depth formal interviews, observation, casual conversation, informal interviews) | Canada  | 44 to 74 (Mean: 61)                                | Older male cricket players of Afro-Caribbean origin (friendly, non-league) and spectators (male and female). N=27 formal interviews plus data collected by observation, casual conversation.<br><br>Gender: Predominantly male<br><br>SES: Not reported<br><br>Ethnicity: Afro-Caribbean<br><br>Alcohol consumption: Most of the participants appeared to drink heavily but not specifically reported | Alcohol and older Caribbean-Canadian men                                                  | +                                                               |
| Kim 2009     | Qualitative (focus group)                                                                       | Canada  | 60+<br><br>62 to 83 (range); mean age 72 (SD 5.94) | N=19 elderly Korean immigrants residing in Canada (14 men, 5 women)<br><br>Gender: 26.3% male; 73.7% female<br><br>SES: Not reported<br><br>Ethnicity: Korean<br><br>Alcohol consumption: Drinking alcohol was a criterion for recruitment. 63.2% drank more than once a week                                                                                                                         | To explore drinking culture, alcohol and alcohol use in older Korean immigrants in Canada | +                                                               |
| Millard 2008 | Qualitative                                                                                     | UK      | 65+                                                | N= 90 staff and managers providing home, day, and                                                                                                                                                                                                                                                                                                                                                     | Alcohol and service                                                                       | -                                                               |

Supplement 3. Kelly et al, Alcohol and older people: a systematic review of barriers, facilitators and context of drinking in older people and implications for intervention design.

| Study       | Study design                                                           | Country    | Age (years)                                           | Population and setting                                                                                                                                                                                                                                                                                                                                                                                                                                                                                                                                                                                                                                                                                                      | Study objective                                                                                                                                  | Overall summary of study quality ± (for qualitative components) |
|-------------|------------------------------------------------------------------------|------------|-------------------------------------------------------|-----------------------------------------------------------------------------------------------------------------------------------------------------------------------------------------------------------------------------------------------------------------------------------------------------------------------------------------------------------------------------------------------------------------------------------------------------------------------------------------------------------------------------------------------------------------------------------------------------------------------------------------------------------------------------------------------------------------------------|--------------------------------------------------------------------------------------------------------------------------------------------------|-----------------------------------------------------------------|
|             | (focus groups)                                                         | (Scotland) |                                                       | residential care to elderly clients.<br><br>Gender: Not reported for staff/managers or elderly clients<br><br>SES: Not reported for staff/managers or elderly clients<br><br>Ethnicity: not reported<br><br>Alcohol consumption: Not reported for staff/managers or elderly clients                                                                                                                                                                                                                                                                                                                                                                                                                                         | gaps in homecare for older people: including how client's alcohol problems were identified, role of home care provider, barriers to seeking help |                                                                 |
| Reczek 2016 | In-depth interviews (n=88); interviews conducted between 2003 and 2009 | US         | 1) Mean: 63.5; Range 40-87<br>2) Mean 59; Range 40-89 | 1) Participants were both spouses in 21 long-term (>7 years) heterosexual marriages (n=42); average marital duration was 32 years; 2 of the 21 currently married women were previously widowed, 5 were previously married; 2 of the 21 currently married men were previously widowed, 4 had been previously married<br>2) A second sample (n=46) included men and women in their first marriages, those who had remarried, currently divorced, never married or widowed participants<br>Gender: 1) and 2) 50% male, 50% female<br>Ethnicity: 1) 88% white, 12% African American; 2) 50% white, 50% African American<br>SES: 1) Mean income \$ 60,000; Range (\$ 40,000 to \$120,000): (based on 2003 to 2006 data); 2) Mean | Relationships between marital history and alcohol use in older adults                                                                            | +                                                               |

Supplement 3. Kelly et al, Alcohol and older people: a systematic review of barriers, facilitators and context of drinking in older people and implications for intervention design.

| Study                                 | Study design                                                         | Country | Age (years)                 | Population and setting                                                                                                                                                                                                                                                                                                                                                                                                                                                                                                                 | Study objective                                                      | Overall summary of study quality ± (for qualitative components) |
|---------------------------------------|----------------------------------------------------------------------|---------|-----------------------------|----------------------------------------------------------------------------------------------------------------------------------------------------------------------------------------------------------------------------------------------------------------------------------------------------------------------------------------------------------------------------------------------------------------------------------------------------------------------------------------------------------------------------------------|----------------------------------------------------------------------|-----------------------------------------------------------------|
|                                       |                                                                      |         |                             | \$52,200; Range \$0-120,000 (based on 2008-2009 data)<br>Alcohol consumption: 1) and 2) Not reported                                                                                                                                                                                                                                                                                                                                                                                                                                   |                                                                      |                                                                 |
| Tolvanen 2005<br>Vitality 90+ project | Qualitative (interviews)                                             | Finland | 90+                         | N=181 participants who mainly lived in their own homes though some were in service housing or in nursing homes<br><br>Gender: 33.5% male; 76.5% female (of interviews that discussed alcohol)<br><br>SES: Not reported<br><br>Ethnicity: not reported<br><br>Alcohol consumption: 63% of men and 34% of women currently used alcohol; 23% of men and 6% of women had previously used alcohol earlier but no longer drank; and 13% of men and 24% of women did not drink at all (based on those who reported consumption in interviews) | Alcohol in life story interviews with Finnish people aged 90 or over | +                                                               |
| Ward 2011                             | Qualitative (N=21 interviews and N=3 focus groups with older people) | UK      | Range: mid 50s to late 80s. | N=21 individual interviews and N=3 focus groups. Aimed to include a diverse range of older people. Included people living in their own homes, in sheltered housing and in hostels<br><br>Gender: 61.9% male, 29.1% female (interviews)<br><br>SES: not reported                                                                                                                                                                                                                                                                        | Older people's perspectives on alcohol use in later life             | +                                                               |

Supplement 3. Kelly et al, Alcohol and older people: a systematic review of barriers, facilitators and context of drinking in older people and implications for intervention design.

| Study                                                 | Study design                                                          | Country                        | Age (years)                 | Population and setting                                                                                                                                                                                                                                                                                                                                                                                                                                                                                                                                                                                                                                       | Study objective                                                                                                         | Overall summary of study quality ± (for qualitative components) |
|-------------------------------------------------------|-----------------------------------------------------------------------|--------------------------------|-----------------------------|--------------------------------------------------------------------------------------------------------------------------------------------------------------------------------------------------------------------------------------------------------------------------------------------------------------------------------------------------------------------------------------------------------------------------------------------------------------------------------------------------------------------------------------------------------------------------------------------------------------------------------------------------------------|-------------------------------------------------------------------------------------------------------------------------|-----------------------------------------------------------------|
|                                                       |                                                                       |                                |                             | <p>Ethnicity: 100% white for interviews but one focus group conducted with black people (explored general views only)</p> <p>Alcohol consumption: Not specifically reported but all participants appeared to consume alcohol. ‘Aim was to recruit people who regularly drink alcohol for whom it may or may not be a problem’</p>                                                                                                                                                                                                                                                                                                                            |                                                                                                                         |                                                                 |
| <p>Wilson 2013<br/>(same sample as Haighton 2016)</p> | <p>Qualitative Interviews (N=24) and 3 focus groups (N=27 people)</p> | <p>UK (North East England)</p> | <p>50+<br/>Range: 50-95</p> | <p>N=24 (qualitative interviews) and N=27 (focus groups) older adults recruited through Age UK and regional services for alcohol problems who had experience of drinking alcohol at any level of consumption</p> <p>Gender: 50% male; 50% female (interviews); 22.2% male; 77.8% female.</p> <p>SES: Not reported</p> <p>Ethnicity: not reported</p> <p>Alcohol consumption: Those recruited had a range of patterns of consumption including occasional minimal drinkers, moderate and heavy drinkers, previously dependent drinkers (including those now abstinent and those currently drinking at sensible levels) and 2 currently dependent drinkers</p> | <p>To understand older people’s reasoning about drinking in later life and how this interacted with health concerns</p> | <p>++</p>                                                       |

Supplement 3. Kelly et al, Alcohol and older people: a systematic review of barriers, facilitators and context of drinking in older people and implications for intervention design.

| Study                                                                                                   | Study design                                                                                  | Country | Age (years)                                   | Population and setting                                                                                                                                                                                                                                                                                                                                                                                                                           | Study objective                                                                                                                                                | Overall summary of study quality ± (for qualitative components) |
|---------------------------------------------------------------------------------------------------------|-----------------------------------------------------------------------------------------------|---------|-----------------------------------------------|--------------------------------------------------------------------------------------------------------------------------------------------------------------------------------------------------------------------------------------------------------------------------------------------------------------------------------------------------------------------------------------------------------------------------------------------------|----------------------------------------------------------------------------------------------------------------------------------------------------------------|-----------------------------------------------------------------|
| <b>Studies with a limited qualitative component</b>                                                     |                                                                                               |         |                                               |                                                                                                                                                                                                                                                                                                                                                                                                                                                  |                                                                                                                                                                |                                                                 |
| Aira 2008<br>(Part of the Geriatric Multidisciplinary Strategy for Good Care of the Elderly Study;GeMS) | Qualitative (interviews) and quantitative assessment of alcohol use using AUDIT-questionnaire | Finland | 75+<br><br>(83.4% aged 75-84; 16.6% aged 85+) | N=699 home-dwelling elderly living in the community<br><br>Gender: 30.5% male; 69.5% female.<br><br>SES: 18.0% had >9 years education; 52.0% had 4-9 years education; 17.4% < 4 years education<br><br>Ethnicity: not reported<br><br>Alcohol consumption: 48.5% had used alcohol in past year; 51.5% had abstained in past year. 19.7% had used alcohol for medicinal purposes (63% of these reported abstaining). Similar in males and females | To describe alcohol use as self-medication by people aged over 75 years                                                                                        | -                                                               |
| Borok 2013                                                                                              | Telephone interviews                                                                          | US      | Mean: 68.7 SD 6.6                             | N=399 older 'at-risk' drinkers (identified by screening) who had taken part in an RCT to reduce drinking<br><br>Gender: 69% male, 31% female.<br><br>SES: 49% had college degree or more; 29% had some college; 22% high school or less<br><br>Ethnicity: 88% white, 8% Hispanic/Latino, 3% other                                                                                                                                                | To understand why older at-risk drinkers decide to increase, decrease or maintain alcohol consumption after participation in an RCT aimed at reducing drinking | -                                                               |



Supplement 3. Kelly et al, Alcohol and older people: a systematic review of barriers, facilitators and context of drinking in older people and implications for intervention design.

| Study | Study design | Country | Age (years) | Population and setting                                                               | Study objective | Overall summary of study quality ± (for qualitative components) |
|-------|--------------|---------|-------------|--------------------------------------------------------------------------------------|-----------------|-----------------------------------------------------------------|
|       |              |         |             | Alcohol consumption: Only at-risk users included: identified by screening with CARET |                 |                                                                 |

± Overall summary of study quality using the methodology and detailed assessment of the domains shown in S4.
