# Supplementary material for: Alcohol and older people: A systematic review of barriers, facilitators and context of drinking in older people and implications for intervention design
Source: PubMed Central journal article supplement (PMC5784942; doi:10.1371/journal.pone.0191189), 2018-01-25
Supplement: pone.0191189.s004.pdf [file pone.0191189.s004.pdf]

## Quality assessment for qualitative studies of alcohol in older people

Note: mixed methods studies were assessed in relation to qualitative evidence only

|                 | Theoretical approach |         | Study design | Data collection       | Trustworthiness |          |          | Analysis     |              |              |            |                    |            | Ethics       | Overall |
|-----------------|----------------------|---------|--------------|-----------------------|-----------------|----------|----------|--------------|--------------|--------------|------------|--------------------|------------|--------------|---------|
|                 | 1                    | 2       | 3            | 4                     | 5               | 6        | 7        | 8            | 9            | 10           | 11         | 12                 | 13         | 14           |         |
| Burruss 2015    | Appropriate          | Clear   | Not sure     | Appropriate           | Clear           | Clear    | Reliable | Not sure     | Rich         | Reliable     | Convincing | Relevant           | Adequate   | Adequate     | +       |
| Dare 2014       | Appropriate          | Clear   | Defensible   | Appropriate           | Clear           | Not sure | Reliable | Rigorous     | Rich         | Reliable     | Convincing | Relevant           | Adequate   | Appropriate  | ++      |
| Haarni 2010     | Appropriate          | Clear   | Not sure     | Inadequately reported | Not described   | Unclear  | Not sure | Not sure     | Not sure     | Not sure     | Not sure   | Partially relevant | Not sure   | Not reported | -       |
| Haighton 2016   | Appropriate          | Clear   | Defensible   | Appropriate           | Clear           | Clear    | Reliable | Rigorous     | Rich         | Reliable     | Convincing | Relevant           | Adequate   | Appropriate  | ++      |
| Johanessen 2015 | Appropriate          | Clear   | Defensible   | Appropriate           | Clear           | Clear    | Reliable | Rigorous     | Rich         | Reliable     | Convincing | Relevant           | Adequate   | Appropriate  | ++      |
| Joseph 2012     | Appropriate          | Unclear | Not sure     | Appropriate           | Clear           | Clear    | Not sure | Not sure     | Rich         | Not sure     | Not sure   | Partially relevant | Adequate   | Not reported | +       |
| Kim 2009        | Appropriate          | Clear   | Defensible   | Appropriate           | Clear           | Clear    | Not sure | Rigorous     | Rich         | Reliable     | Not sure   | Partially relevant | Not sure   | Not reported | +       |
| Millard 2008    | Appropriate          | Mixed   | Not sure     | Inadequately reported | Not described   | Unclear  | Not sure | Not reported | Not reported | Not reported | Not sure   | Relevant           | Not sure   | Not reported | -       |
| Reczek 2016     | Appropriate          | Clear   | Defensible   | Appropriate           | Clear           | Not sure | Not sure | Rigorous     | Rich         | Not sure     | Convincing | Relevant           | Adequate   | Appropriate  | +       |
| Tolvanen 2005   | Appropriate          | Mixed   | Defensible   | Appropriate           | Clear           | Not sure | Not sure | Rigorous     | Rich         | Not sure     | Convincing | Relevant           | Adequate   | Not reported | +       |
| Ward 2011       | Appropriate          | Clear   | Defensible   | Appropriate           | Clear           | Clear    | Not sure | Not reported | Not sure     | Not reported | Convincing | Relevant           | Adequate   | Not reported | +       |
| Wilson 2013     | Appropriate          | Clear   | Defensible   | Appropriate           | Clear           | Clear    | Reliable | Rigorous     | Rich         | Reliable     | Convincing | Relevant           | Adequate   | Appropriate  | ++      |
| Aira 2008       | Appropriate          | Clear   | Not sure     | Appropriate           | Unclear         | Unclear  | Not sure | Not reported | Poor         | Not reported | Not sure   | Partially relevant | Inadequate | Appropriate  | -       |
| Borok           | Appropriate          | Clear   | Not sure     | Inadequately reported | Unclear         | Clear    | Not sure | Not sure     | Poor         | Not sure     | Not sure   | Relevant           | Not sure   | Not reported | -       |

**Key to headings:** **Theoretical approach** 1. Is a qualitative approach appropriate? 2. Is the study clear in what it seeks to do? **Study design** 3. How defensible/rigorous is the research design/methodology? **Data collection** 4. How well was the data collection carried out? **Trustworthiness** 5. Is the role of the researcher clearly described? 6. Is the context clearly described? 7. Were the methods reliable? **Analysis** 8. Is the data analysis sufficiently rigorous? 9. Is the data 'rich'? 10. Is the analysis reliable? 11. Are the findings convincing? 12. Are the findings relevant to the aim of the study? 13. Conclusions **Ethics** 14. How clear and coherent is the reporting of ethics? (National Institute for Health and Care Excellence (NICE) Methodology checklist: qualitative studies. <https://www.nice.org.uk/process/pmg4/chapter/appendix-h-quality-appraisal-checklist-qualitative-studies>)
